# Supplementary material for: Evolutionary relationships of the Critically Endangered frog Ericabatrachus baleensis Largen, 1991 with notes on incorporating previously unsampled taxa into large-scale phylogenetic analyses
Source: PubMed Central journal article supplement (PMC4008257; doi:10.1186/1471-2148-14-44), 2014-03-10

### Protein Coding genes

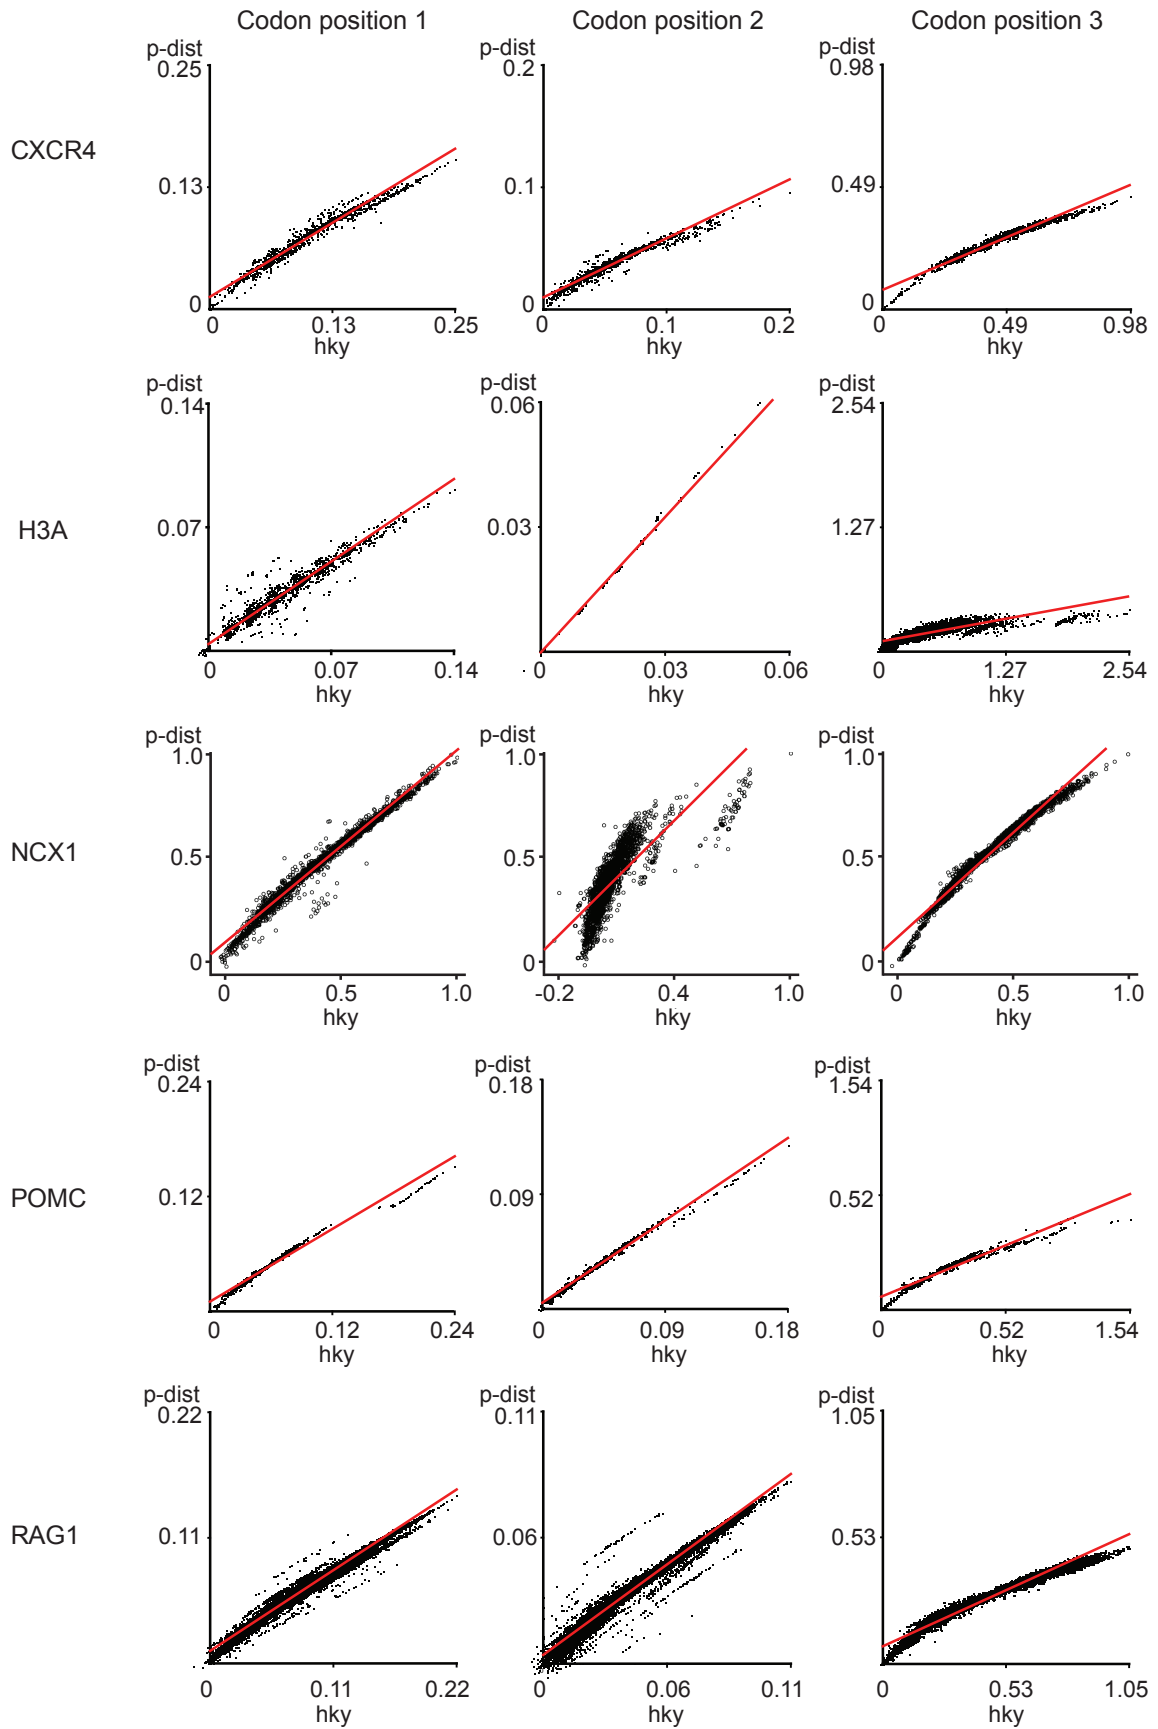

### Protein Coding genes (continued)

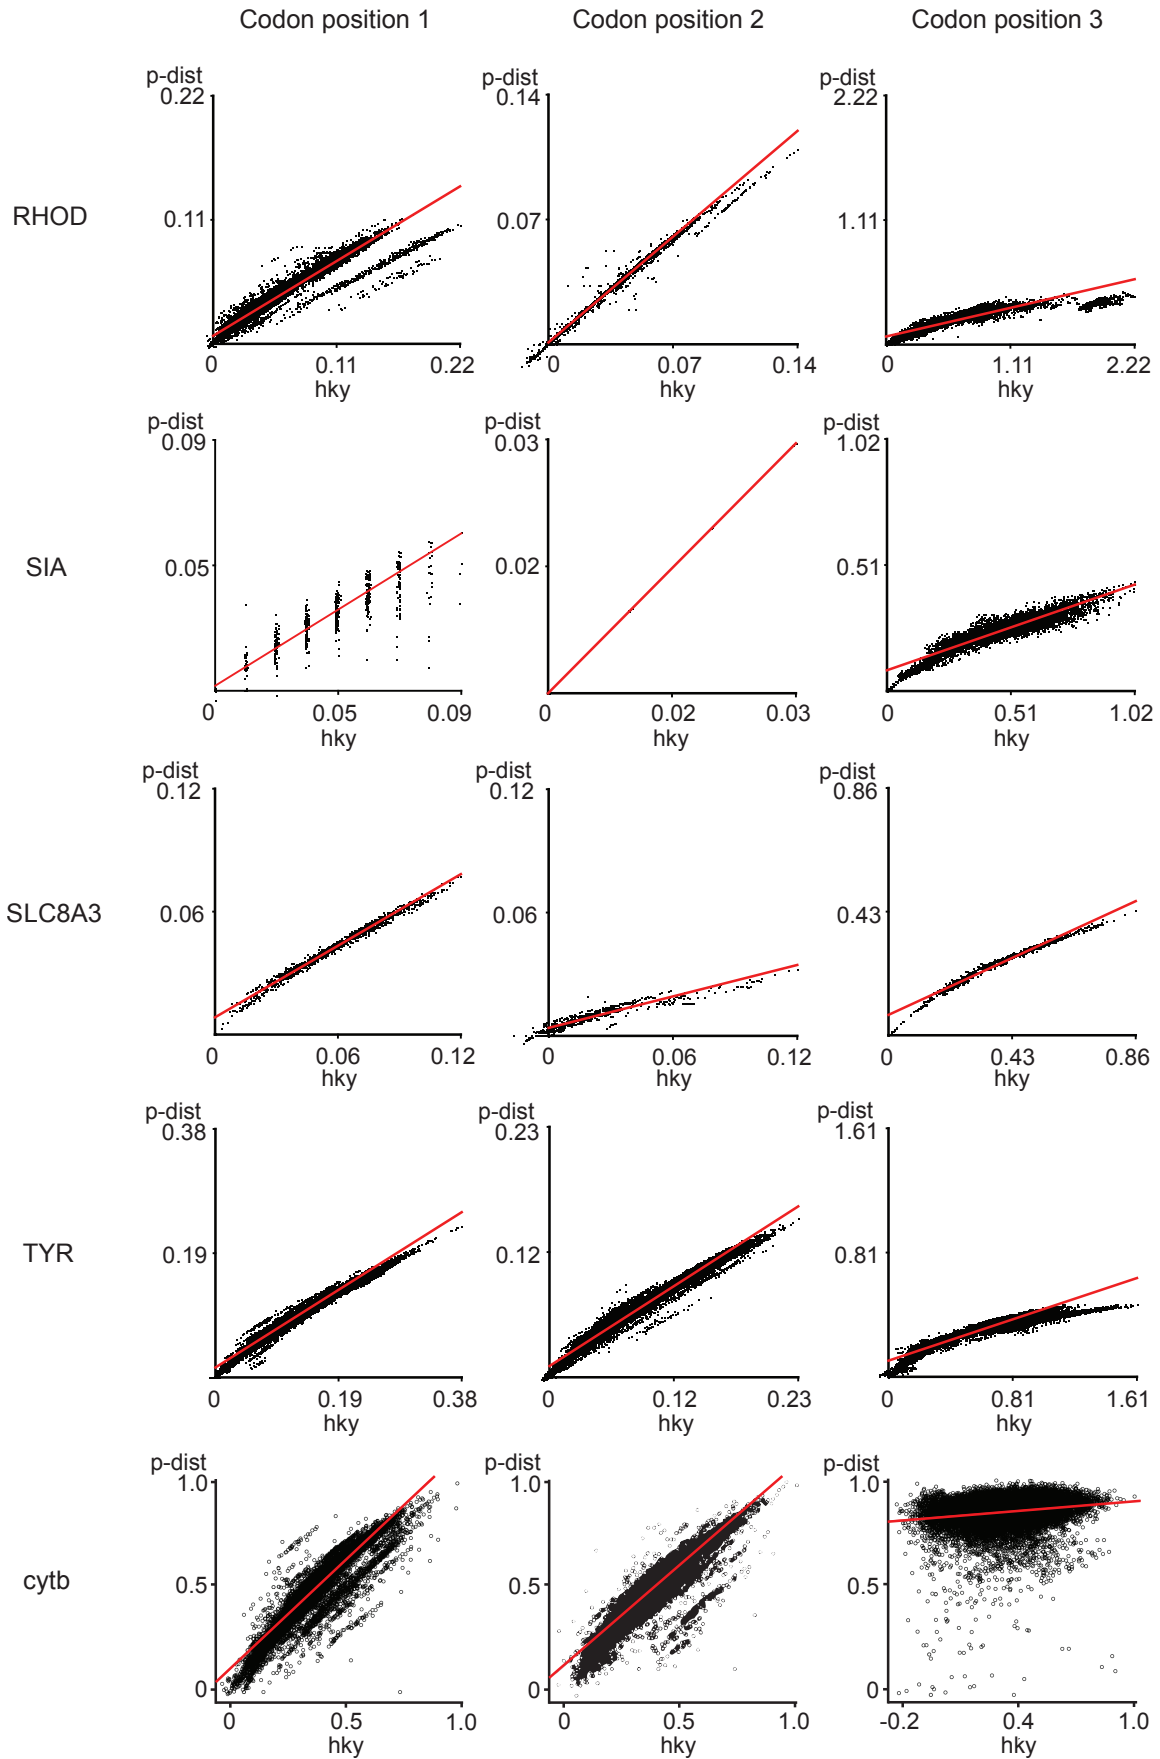

## Non Protein Coding Genes

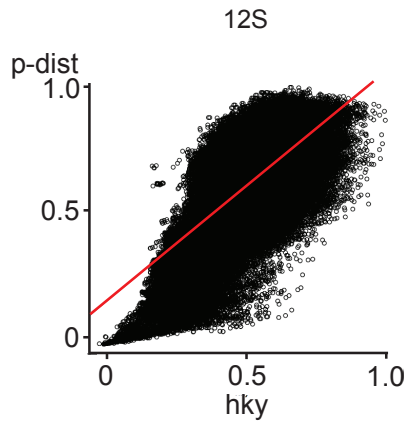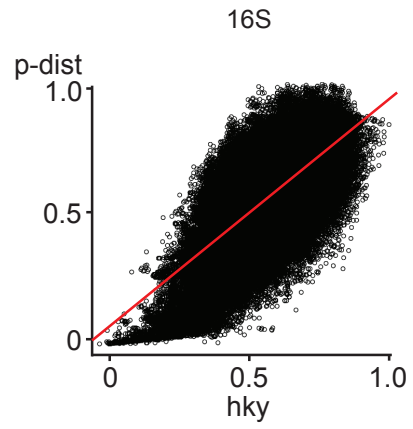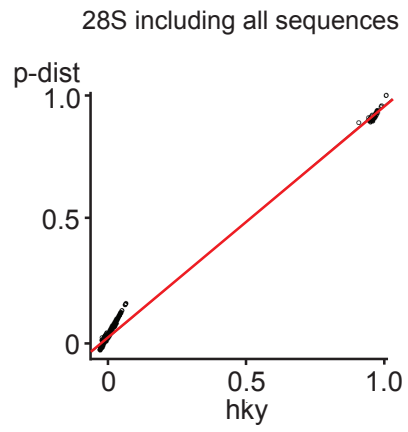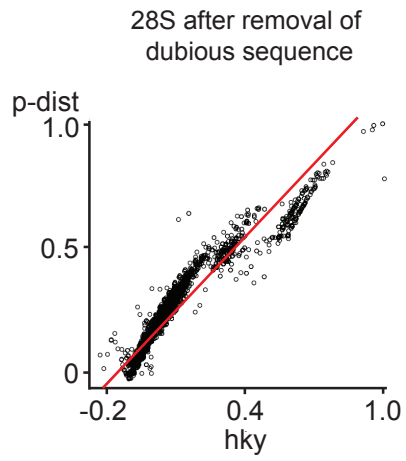

Supplement: 1471-2148-14-44-S1.pdf [file 1471-2148-14-44-S1.pdf]
