# Supplementary material for: Evolutionary relationships of the Critically Endangered frog Ericabatrachus baleensis Largen, 1991 with notes on incorporating previously unsampled taxa into large-scale phylogenetic analyses
Source: PubMed Central journal article supplement (PMC4008257; doi:10.1186/1471-2148-14-44), 2014-03-10
Supplement: 1471-2148-14-44-S3.pdf [file 1471-2148-14-44-S3.pdf]

### Additional file 3 – Sequences produced for this study.

**Table S1. GenBank accession numbers for the *Ericabatrachus baleensis* sequences generated in the present study.**

| No./ Molecular Accession | Voucher and Field Number   | Locality                            | 12S      | 16S      | 28S      | H3A      | RAG1     |
|--------------------------|----------------------------|-------------------------------------|----------|----------|----------|----------|----------|
| T880                     | ZNHM-AAU-A2013-003 SL 065  | Fute, Harena Forest, Bale Mountains | KF938362 | KF938365 | KF938368 | KF938369 | KF938370 |
| T1083                    | ZNHM-AAU-A2013-001 AK 2020 | Fute, Harena Forest, Bale Mountains | KF938363 | KF938366 | -        | -        | KF938371 |
| T1084                    | ZNHM-AAU-A2013-002 AK 2022 | Fute, Harena Forest, Bale Mountains | KF938364 | KF938367 | -        | -        | KF938372 |

**Table S2. Primers used in this study.**

Refer to text for abbreviations.

| Gene        | Primer                                                              |
|-------------|---------------------------------------------------------------------|
| <i>12S</i>  | 12S A-L: AACTGGGATTAGATACCCCACTAT<br>12S F-H: CTTGGCTCGTAGTCCCTGGCG |
| <i>16S</i>  | 16AR: CGCCTGTTTATCAAAAACAT<br>16Br: CCGGTCTGAACTCAGATCACGT          |
| <i>RAG1</i> | RAG 1c: GGAGATGTTAGTGAGAARCA YGG<br>RAG 1e: TCCGCTGCATTTCCRATGTCRCA |
| <i>28S</i>  | 28Sv: AAGGTAGCCAAATGCCTCATC<br>28Sjj: AGTAGGGTAAAACCT               |
| <i>H3A</i>  | h3F: ATGGCTCGTACCAAGCAGACVGC<br>h3R: TATCCTTRGGCATRATRGTGAC         |

### Note on intraspecific variation

The three samples of *Ericabatrachus baleensis* presented no variation at the nuclear RAG1 and mitochondrial 12S and 16S.
