# Supplementary material for: Evolutionary relationships of the Critically Endangered frog Ericabatrachus baleensis Largen, 1991 with notes on incorporating previously unsampled taxa into large-scale phylogenetic analyses
Source: PubMed Central journal article supplement (PMC4008257; doi:10.1186/1471-2148-14-44), 2014-03-10
Supplement: 1471-2148-14-44-S5.pdf [file 1471-2148-14-44-S5.pdf]

## Single gene analyses

Please note the names for taxa here and in all trees presented in this study are given according to those downloaded from Genbank. Therefore some taxonomic names are incorrect, e.g. *Petropedetes newtoni* is a synonym of *P. johnstoni* following [1].

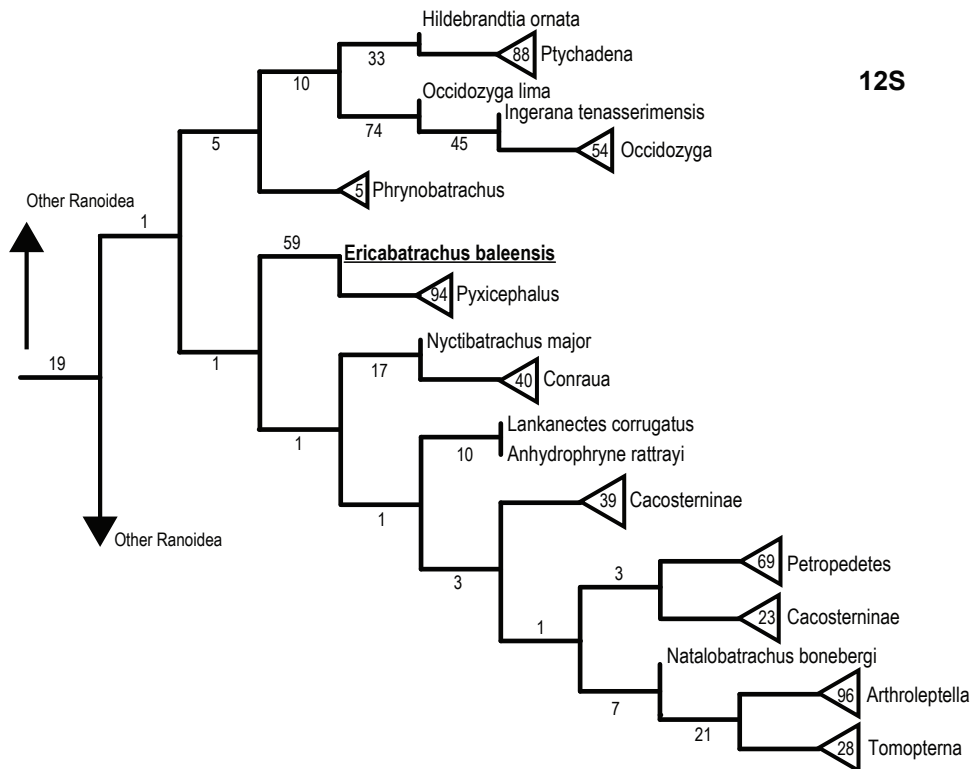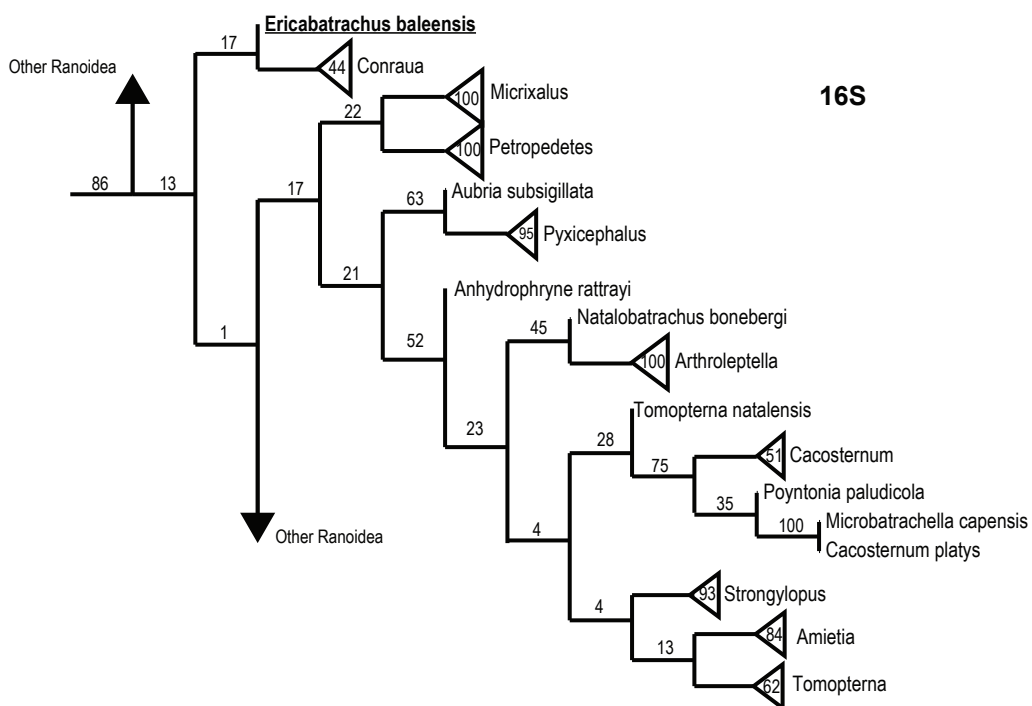

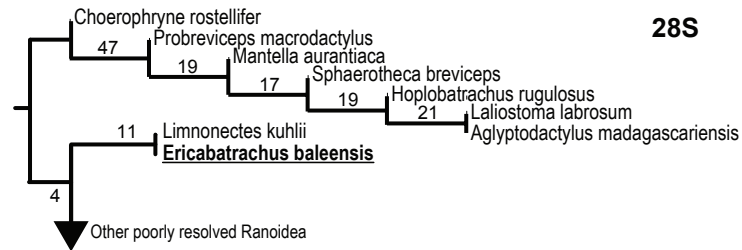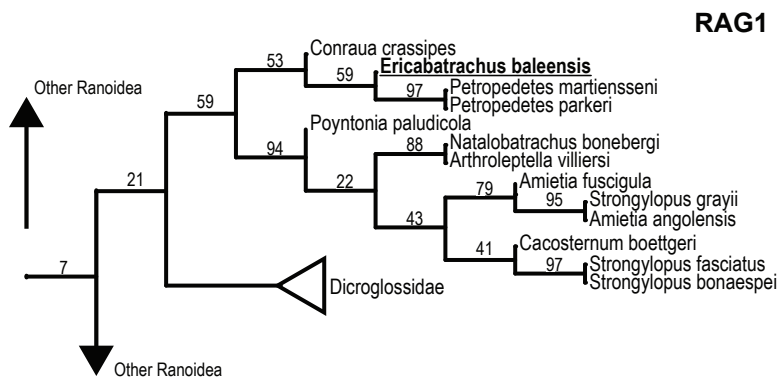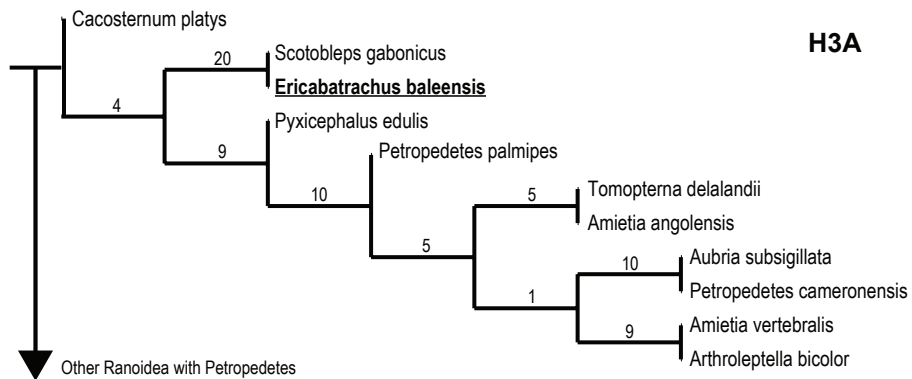

## Reference

Barej MF, Rödel M-O, Gonwouo LN, Pauwels OSG, Böhme W, Schmitz A: **Review of the genus *Petropedetes* Reichenow, 1874 in Central Africa with the description of three new species (Amphibia: Anura: Petropedetidae).** *Zootaxa* 2010, **2340**:1-49.
